# Supplementary material for: Plumage condition in laying hens: genetic parameters for direct and indirect effects in two purebred layer lines
Source: PubMed Central journal article supplement (PMC4073196; doi:10.1186/1297-9686-46-33), 2014-05-29
Supplement: 1297-9686-46-33-S1.pdf [file 1297-9686-46-33-S1.pdf]

# Additional file 1

**Table S1 Estimates of genetic parameters from the univariate classical animal model and corresponding SE of FCS**

| Line | Region | $\sigma_A$  | $\sigma_{cage}^2$ | $\sigma_p^2$ |
|------|--------|-------------|-------------------|--------------|
| W1   | Neck   | 0.134±0.017 | 0.099±0.006       | 0.307±0.007  |
|      | Back   | 0.117±0.015 | 0.035 ±0.003      | 0.186±0.004  |
|      | Rump   | 0.059±0.014 | 0.105 ±0.005      | 0.243±0.006  |
|      | Belly  | 0.180±0.021 | 0.099±0.007       | 0.414±0.009  |
|      | Total  | 0.348±0.043 | 0.805 ±0.044      | 2.031±0.048  |
| WB   | Neck   | 0.307±0.029 | 0.471 ±0.023      | 0.956±0.025  |
|      | Back   | 0.221±0.030 | 0.435±0.022       | 0.933±0.023  |
|      | Rump   | 0.238±0.030 | 0.680±0.031       | 1.184±0.032  |
|      | Belly  | 0.229±0.031 | 0.235±0.016       | 0.831±0.019  |
|      | Total  | 0.949±0.091 | 5.260±0.241       | 9.479±0.257  |

Estimates are shown for FCS in each body region and for total FCS in two lines (W1, WB);  $\sigma_A$  is the genetic standard deviation;  $\sigma_c^2$  is the cage variance;  $\sigma_p^2$  is the phenotypic variance:  $\sigma_p^2 = \sigma_A^2 + \sigma_c^2 + \sigma_e^2$ . FCS is feather condition score, for each body region FCS ranges from 1 through 5, and total FCS ranges from 4 through 20.

**Table S2 Estimates of genetic parameters from the univariate direct-indirect effects model and corresponding SE of FCS**

| Line  | Region      | $\sigma_{A_D}$ | $\sigma_{A_S}$ | $\sigma_{TBV}$ | $\sigma_{cage}^2$ | $\sigma_P^2$ | $r_A$      |
|-------|-------------|----------------|----------------|----------------|-------------------|--------------|------------|
| W1    | Neck        | 0.135          | 0.061          | 0.244          | 0.087             | 0.306        | 0.16       |
|       |             | $\pm 0.019$    | $\pm 0.013$    | $\pm 0.049$    | $\pm 0.007$       | $\pm 0.007$  | $\pm 0.23$ |
|       | Back        | 0.118          | 0.055          | 0.218          | 0.026             | 0.185        | 0.16       |
|       |             | $\pm 0.015$    | $\pm 0.010$    | $\pm 0.036$    | $\pm 0.004$       | $\pm 0.004$  | $\pm 0.21$ |
|       | Rump        | 0.045          | 0.051          | 0.154          | 0.100             | 0.243        | -0.12      |
|       |             | $\pm 0.019$    | $\pm 0.013$    | $\pm 0.052$    | $\pm 0.006$       | $\pm 0.006$  | $\pm 0.51$ |
| Belly | 0.181       | 0.048          | 0.243          | 0.092          | 0.414             | 0.11         |            |
|       | $\pm 0.021$ | $\pm 0.016$    | $\pm 0.052$    | $\pm 0.009$    | $\pm 0.009$       | $\pm 0.28$   |            |
| Total | 0.335       | 0.197          | 0.713          | 0.701          | 2.022             | 0.12         |            |
|       | $\pm 0.047$ | $\pm 0.033$    | $\pm 0.129$    | $\pm 0.053$    | $\pm 0.049$       | $\pm 0.21$   |            |
| WB    | Neck        | 0.270          | 0.193          | 0.595          | 0.403             | 0.954        | -0.17      |
|       |             | $\pm 0.031$    | $\pm 0.026$    | $\pm 0.097$    | $\pm 0.029$       | $\pm 0.026$  | $\pm 0.18$ |
|       | Back        | 0.157          | 0.204          | 0.572          | 0.367             | 0.936        | -0.38      |
|       |             | $\pm 0.032$    | $\pm 0.025$    | $\pm 0.092$    | $\pm 0.027$       | $\pm 0.025$  | $\pm 0.24$ |
|       | Rump        | 0.185          | 0.240          | 0.735          | 0.559             | 1.185        | -0.05      |
|       |             | $\pm 0.035$    | $\pm 0.030$    | $\pm 0.110$    | $\pm 0.040$       | $\pm 0.034$  | $\pm 0.22$ |
| Belly | 0.241       | 0.109          | 0.459          | 0.197          | 0.832             | 0.29         |            |
|       | $\pm 0.033$ | $\pm 0.022$    | $\pm 0.084$    | $\pm 0.021$    | $\pm 0.019$       | $\pm 0.22$   |            |
| Total | 0.718       | 0.775          | 2.254          | 4.170          | 9.475             | -0.25        |            |
|       | $\pm 0.096$ | $\pm 0.084$    | $\pm 0.309$    | $\pm 0.318$    | $\pm 0.276$       | $\pm 0.18$   |            |

Estimates are shown for FCS in each body region and for total FCS in two lines (W1, WB);  $\sigma_{A_D}$  and  $\sigma_{A_S}$  are estimates of the standard deviation of the direct breeding value and the standard deviation of the indirect breeding value.  $\sigma_{TBV}$  is the standard deviation of the total breeding value:  $\sigma_{TBV}^2 = \sigma_{A_D}^2 + 2(n-1)\sigma_{A_{DS}} + (n-1)^2\sigma_{A_S}^2$ .  $\sigma_c^2$  is the cage variance.  $\sigma_P^2$  is the phenotypic variance:  $\sigma_P^2 = \sigma_{A_D}^2 + (n-1)\sigma_{A_S}^2 + \sigma_c^2 + \sigma_e^2$ .  $r_A$  is the genetic correlation between the direct breeding value and the indirect breeding value. FCS is feather condition score, for each body region FCS ranges from 1 through 5, and total FCS ranges from 4 through 20.

**Table S3 Estimates of genetic correlations between the four body regions from the direct-indirect effects model.**

| Line | Region | Region          |                 |                 |           |
|------|--------|-----------------|-----------------|-----------------|-----------|
|      |        | Neck            | Back            | Rump            | Belly     |
| W1   | Neck   |                 | 0.84±0.13       | NC <sup>1</sup> | >0.99     |
|      | Back   | 0.75±0.11       |                 | 0.92±0.14       | 0.75±0.30 |
|      | Rump   | NC <sup>1</sup> | 0.87±0.20       |                 | >0.99     |
|      | Belly  | 0.09±0.18       | -0.02±0.18      | 0.48±0.28       |           |
| WB   | Neck   |                 | NC <sup>1</sup> | 0.97±0.03       | 0.92±0.09 |
|      | Back   | NC <sup>1</sup> |                 | 0.98±0.03       | 0.85±0.11 |
|      | Rump   | 0.65±0.14       | 0.74±0.13       |                 | 0.74±0.13 |
|      | Belly  | 0.47±0.15       | 0.46±0.20       | 0.25±0.21       |           |

Estimates are shown for FCS in each body region in two lines (W1, WB); the estimates below the diagonal refer to the direct genetic correlations ( $r_{12D}$ ); the estimates above the diagonal refer to the indirect genetic correlations ( $r_{12S}$ ); <sup>1</sup>NC = not converged

**Table S4 Means with corresponding SD of the four persons who recorded the FCS**

| Person | n    | W1    |       |       |       | WB    |       |       |       |
|--------|------|-------|-------|-------|-------|-------|-------|-------|-------|
|        |      | Neck  | Back  | Rump  | Belly | Neck  | Back  | Rump  | Belly |
| 1      | 2988 | 1.30  | 1.30  | 1.19  | 1.36  | 2.28  | 1.60  | 2.17  | 1.72  |
|        |      | ±0.59 | ±0.41 | ±0.52 | ±0.70 | ±1.18 | ±1.04 | ±1.25 | ±1.01 |
| 2      | 2870 | 1.22  | 1.12  | 1.23  | 1.32  | 1.99  | 1.70  | 2.26  | 1.57  |
|        |      | ±0.47 | ±0.40 | ±0.57 | ±0.75 | ±1.01 | ±1.10 | ±1.19 | ±0.99 |
| 3      | 2970 | 1.48  | 1.16  | 1.13  | 1.36  | 2.65  | 1.68  | 2.13  | 1.65  |
|        |      | ±0.68 | ±0.46 | ±0.46 | ±0.67 | ±1.21 | ±1.11 | ±1.30 | ±0.96 |
| 4      | 3364 | 1.46  | 1.22  | 1.16  | 1.17  | 2.32  | 1.63  | 2.11  | 1.49  |
|        |      | ±0.57 | ±0.48 | ±0.48 | ±0.50 | ±1.11 | ±0.96 | ±1.26 | ±0.82 |

Estimates with corresponding SD are shown for each body region in two lines (W1, WB); FCS is feather condition score, for each body region FCS ranges from 1 through 5, and total FCS ranges from 4 through 20.
